# Supplementary material
Source: PubMed Central journal article supplement (PMC3593228)
Supplement: NIHMS445013-supplement-1.pdf [file NIHMS445013-supplement-1.pdf]

## Supplementary

Table 1. Characteristics of AML patients whose BM samples were treated with ARRY-520 for colony forming assay

| <b>Blast %</b> | <b>Cytogenetics</b>                          | <b>Treatment and Responses</b>                                                                                                                                                                                           |
|----------------|----------------------------------------------|--------------------------------------------------------------------------------------------------------------------------------------------------------------------------------------------------------------------------|
| 72             | 46,XX[20]                                    | untreated at sampling; later treated with 5-AZA+VA+ATRA, resistant; treated with Ara-C, died                                                                                                                             |
| 92             | 46,XX,t(9;11)(p22;q23)[20]                   | untreated at sampling; treated with IA+ZARNESTRA, died                                                                                                                                                                   |
| 61             | 46,XX[20]                                    | untreated at sampling; later treated with IDA+HDAC, achieved CR and then relapsed; resistant to various therapies including Mitoxantrone+etoposide+Ara C, sorafenib, decitabine+Mylotarg, and sorafenib+idarubicin+Ara C |
| 76             | 46,XY[20]                                    | untreated at sampling; later treated with IDA+HDAC, achieved CR then relapsed; disease progressed on sapacitabine                                                                                                        |
| 81             | 45,XY,t(3;3)(q21;q26.2),-7[17]; 45,idem[cp3] | resistant to 3+7 followed by 2+5 treatment; no response to imatinib; resistant to mitoxantrone and etoposide; after sampling, treated with sapacitabine, TCN-PM, Mylotarg+Ara-C+decitabine and resistant to all          |
